# Supplementary material
Source: PubMed Central journal article supplement (PMC2688456)
Supplement: NIHMS102651-supplement-1.pdf [file NIHMS102651-supplement-1.pdf]

## **Supplementary Material for:**

### **An endonuclease-generated DNA break induces antigenic switching in *Trypanosoma brucei***

Catharine E. Boothroyd<sup>1\*</sup>, Oliver Dreesen<sup>2\*</sup>, Tatyana Leonova<sup>1</sup>, K. Ina Ly<sup>1</sup>, Luisa M. Figueiredo<sup>2</sup>, George A.M. Cross<sup>2</sup>, and F. Nina Papavasiliou<sup>1</sup>

<sup>1</sup>*Laboratory of Lymphocyte Biology and*

<sup>2</sup>*Laboratory of Molecular Parasitology, The Rockefeller University, New York, NY 10065, USA*

*\*These authors contributed equally to this work.*

#### **Supplementary Figure Legends**

**Supplementary Figure S1**

**Supplementary Figure S2**

**Supplementary Figure S3**

**Supplementary Table S1**

## Supplementary Figure Legends

**Supplementary Figure S1: Processing of the I-SceI-induced DSB. a,** Sequences of the 70-bp repeat regions from the 70.II (VSG 221 ES) cell line (top, black) and VSG 224 ES (bottom, red). The I-SceI RS is underlined. Regions homologous to the primer used for sequencing (in b) are indicated in bold. Sequencing results from the five clones that switched to VSG 224 (shown in b) indicate loss of the I-SceI RS, exonucleolytic degradation of ~500 bp of the VSG 221 ES (recipient, to the region highlighted in blue), and invasion of the first homologous region in the VSG 224 ES proximal to the VSG (donor, region highlighted in gray). **b,** Sequencing results of the five clones that switched to VSG 224. Sequences coming from the VSG 221 ES and VSG 224 ES are shown in black and red, respectively. There are several regions with polymorphisms (blue), such as the one shown to the right.

**Supplementary Figure S2: Loss of the VSG 221 sub-telomeric region in the switched clones.** The sub-telomeric region from the switched clones was amplified with primers specific to the VSG 221 sub-telomeric region (shown in Fig. 3a). Only the parental line (PA) retains this region. Amplification of *tubulin* is shown as a control.

**Supplementary Figure S3: Correct integration of the I-SceI RS. a,** Schematic representation of restriction sites and expected fragments used to verify integration of the I-SceI RS. **b,** Southern blot analyses showing clones in which the integration of the I-SceI RS was verified by digestion with *XhoI* and I-SceI and probing with Puromycin (circled bands). Up to 21 clones were screened for each cell line.

**Supplementary Table S1: Summary table of VSG donors in 18 independent switching events.** The VSG genes expressed in the switched clones were duplicated from silent ESs and mini-chromosomes. Like-colored boxes represent clones expressing the same VSGs.

Supplementary Figure S1

**a** Primer: **ggagagtgttgtagtgtg**

**70.II (VSG 221 ES)**

**ggagagtgttgtagtgtgtatatacgaatattataataa**gagcagtaataataataataatgataatgataatagaagagtgtttagtgtgtatatacgaatattataa  
 taagagcagtaataatgataatgataatcaggagaggtgttgtagtgtgtatatacgaatataataataaaagcagtaataataataataataatgataatgata**ggag**  
**agtgttgtagtgtgt**gtatatacgaatattataatgaccagtaaatagtaataacaataagaatcataatgataataggagagtgttgtagtgtatatacgaatattat  
 aataagagcagtactaatgataataatattag**ggagagtgttgtagtgtg**gtatatacgaatattatacactaagagcagtaataagataataataat**ggagagtgttgtagt**  
**gtg**tgcttaccatattataataatgataatgacaccaa**tagggataacagggtaat**tcgaggggtgctcaagct[...][VSG221]

**VSG 224 ES**

**ggagagtgttgtagtgtgt**gtatatacgaatattataataaaagcagtaataataataataatgataataatgata**ggagagtgttgtagtgtg**gtatatacgaatattataa  
 taagagcagtaataataataataataatgataataaaataggagagtggtgtaagtgtgtgtatatacgaatattatagtaagagcagtaataataatgataataataat  
 aggagagtgttgta**gtgtgtatatacgaatattataataa**gtaatgatagtaaatagtaaaaat[...][VSG224]

|          |                |                                                                          |                          |      |                        |
|----------|----------------|--------------------------------------------------------------------------|--------------------------|------|------------------------|
| <b>b</b> | <b>VSG 221</b> | TGTTGTGAGTGTGTGTATATACGAATATTATAATAA                                     | gagcagtaataataataataatga | [..] |                        |
|          | <b>VSG 224</b> | gtttgta <b>gtgtgtgtatatacgaatattataataa</b>                              | GTAATGATAGTAATAGTAAAAATA | [..] | AAATAACACCCA           |
|          | Cl. 2          | TGTTG <b>GTGAGTGTGTGTATATACGAATATTATAATAAGAGCAGTAATGATAGTAATAGTAAAAA</b> |                          | [..] | AAATAACACCCA           |
|          | Cl. 3          | TGTTGTGAGTGTGTGTATATACGAATATTATAATA <b>AGTAATGATAGTAATAGTAAAAATA</b>     |                          | [..] | AAA <b>T</b> ACACCCA   |
|          | Cl. 4          | TGTTGTGAGTGTGTGTATATACGAATATTATAATAAGAGCAG <b>TAATGATAGTAATAGTAAAAAT</b> |                          | [..] | AAATAACACCCA           |
|          | Cl. 22         | TGTTGTGAGTGTGTGTATATACGAATATTATAATA <b>AGTAATGATAGTAATAGTAAAAATA</b>     |                          | [..] | AAA-TAC <b>C</b> ACCCA |
|          | Cl. 25         | TGTTGTGAGTGTGTGTATATACGAATATTATAATA <b>AGTAATGATAGTAATAGTAAAAATA</b>     |                          | [..] | AAA <b>T</b> AACACCCA  |

Supplementary Figure S2

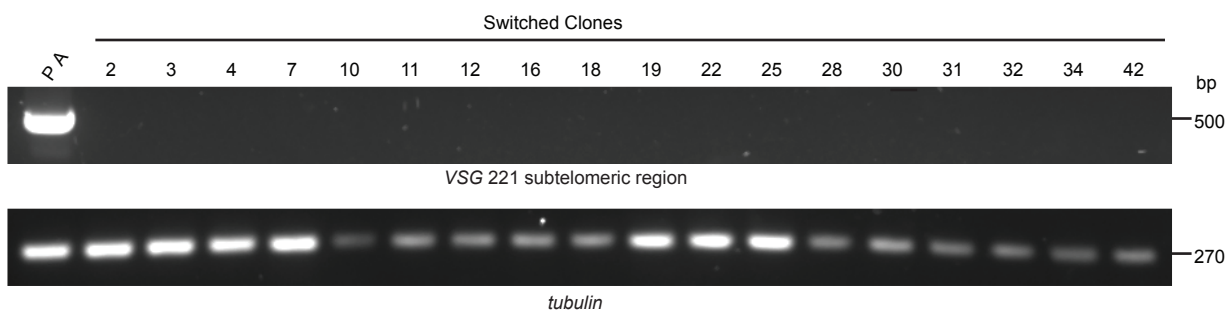

Supplementary Figure S3

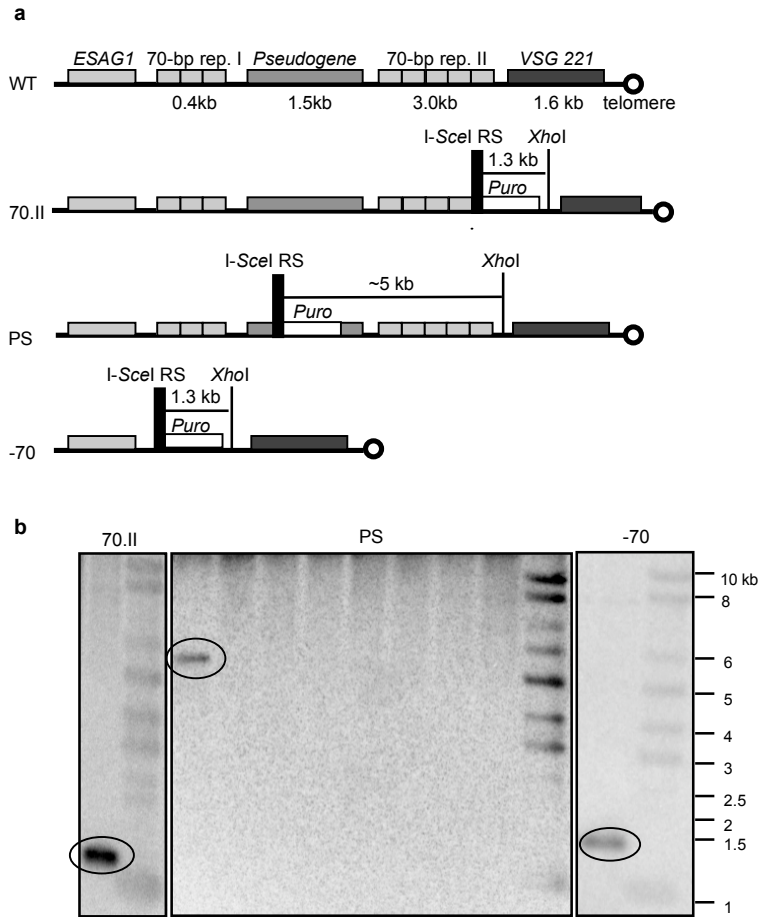

| Clone # | Donor VSG |                           |                   |                 |                |
|---------|-----------|---------------------------|-------------------|-----------------|----------------|
|         | MITat     | Hertz-Fowler <sup>6</sup> | Lab-Specific Name | Location        | GenBank Number |
| 2       | 1.3       | 427-3                     | 224               | BES7/TAR153     | AY935575       |
| 3       | 1.3       | 427-3                     | 224               | BES7/TAR153     | AY935575       |
| 4       | 1.3       | 427-3                     | 224               | BES7/TAR153     | AY935575       |
| 7       | 1.8       | 427-8                     | 1.8               | BES12/TAR29     | AY935574       |
| 10      | 1.1       | 427-1                     | 060               | Chr.5           | X56761         |
| 11      | 1.9       | 427-9                     | V02               | BES2/TAR129     | AY935573       |
| 12      | 1.6       | 427-6                     | 121               | BES3/TAR15      | X56764         |
| 16      |           |                           |                   | Chr.11          | XM_824682      |
| 18      |           |                           |                   | Chr.11          | XM_824682      |
| 19      | 1.11      | 427-11                    | bR-2              | BES15/TAR126    | AY935571       |
| 22      | 1.3       | 427-3                     | 224               | BES7/TAR153     | AY935575       |
| 25      | 1.3       | 427-3                     | 224               | BES7/TAR153     | AY935575       |
| 28      |           | 427-23                    |                   | Mini-chromosome | FJ98214        |
| 30      | 1.9       | 427-9                     | V02               | BES2/TAR129     | AY935573       |
| 31      |           | 427-24                    |                   | Mini-chromosome | FJ98212        |
| 32      | 1.8       | 427-8                     | 1.8               | BES12/TAR29     | AY935574       |
| 34      | 1.1       | 427-1                     | 060               | Chr.5           | X56761         |
| 42      |           | 427-25                    |                   | Mini-chromosome | FJ98213        |
